# Supplementary material for: Patterns of Post-Endodontic Restoration: A Nationwide Survey of Dentists in Turkey
Source: MDPI journal article supplement (doi:10.3390/ijerph19031794), 2022-02-04
Supplement: s1 [file s1]

**Table S1.** The 10 questions about the basic demographic details of the respondents, patterns of post-endodontic restoration, materials, and methods, and factors affecting the choices of contemporary restoration alternatives.

| QUESTIONS                                                                                      | ANSWERS                                                                       |
|------------------------------------------------------------------------------------------------|-------------------------------------------------------------------------------|
| Q1: How long have you been practicing dentistry?                                               | 0-5 years                                                                     |
|                                                                                                | 6-10 years                                                                    |
|                                                                                                | 11-20 years                                                                   |
|                                                                                                | >20 years                                                                     |
| Q2: What is your specialty?                                                                    | Endodontics                                                                   |
|                                                                                                | Orthodontics                                                                  |
|                                                                                                | Pediatric dentistry                                                           |
|                                                                                                | Oral and maxillofacial surgery                                                |
|                                                                                                | Prosthodontics                                                                |
|                                                                                                | Restorative dentistry                                                         |
|                                                                                                | Oral and maxillofacial radiology                                              |
|                                                                                                | Periodontology                                                                |
|                                                                                                | General dental practitioners without any special training                     |
| Q3: Which institution do you practice in?                                                      | The private clinic                                                            |
|                                                                                                | University hospital                                                           |
|                                                                                                | Oral and dental health center                                                 |
|                                                                                                | Other                                                                         |
| Q4: Which geographic region do you practice in?                                                | Dental practitioners were able to write which city they work in this section. |
| Q5: What is the most influential factor in choosing your post-endodontic restoration strategy? | Economic factors                                                              |
|                                                                                                | Aesthetic purposes                                                            |
|                                                                                                | Periodontal condition of the tooth                                            |
|                                                                                                | The remaining tooth structure                                                 |
|                                                                                                | Tooth location                                                                |
|                                                                                                | Habits and expectations of the patient                                        |
|                                                                                                | Other                                                                         |
| Q6: Which coronal restoration type do you prefer mostly in post-endodontic restoration?        | Amalgam                                                                       |
|                                                                                                | Composite resin                                                               |
|                                                                                                | Glass ionomer                                                                 |
|                                                                                                | Inlays/ Onlays/ Overlays                                                      |
|                                                                                                | Endocrown                                                                     |
|                                                                                                | Metal-ceramic crowns                                                          |
|                                                                                                | Ceramic-composite resin veneers                                               |
|                                                                                                | Combined restorations                                                         |
|                                                                                                | Other                                                                         |
| Q7: How frequently do you use a post for post-endodontic restoration?                          | Always                                                                        |
|                                                                                                | Occasionally                                                                  |
|                                                                                                | Rarely                                                                        |
| Q8: What is the most influential factor in choosing your post option?                          | Economic factors                                                              |
|                                                                                                | Aesthetic purposes                                                            |
|                                                                                                | Function                                                                      |
|                                                                                                | Ease of application                                                           |
|                                                                                                | Ferrule effect                                                                |
|                                                                                                | The width of the canal                                                        |
|                                                                                                | Ease of removal when a problem has occurred                                   |
|                                                                                                | Other                                                                         |

|                                                                                                   |                                                                                                   |
|---------------------------------------------------------------------------------------------------|---------------------------------------------------------------------------------------------------|
| <p><b>Q9:</b> Which type of post do you use most frequently for post- endodontic restoration?</p> | <p>Prefabricated metal posts<br/>Cast posts-and-cores<br/>Fiber posts<br/>Other</p>               |
| <p><b>Q10:</b> What is the most common problem you encounter in post-endodontic restorations?</p> | <p>Adhesive problems<br/>Coronal fractures<br/>Vertical root fractures<br/>Aesthetic problems</p> |
